# Supplementary material for: Vitamin D Supplementation and Blood Pressure in Children and Adolescents: A Systematic Review and Meta-Analysis
Source: PubMed Central journal article supplement (PMC7230389; doi:10.3390/nu12041163), 2020-04-22
Supplement: nutrients-12-01163-s001.pdf [file nutrients-12-01163-s001.pdf]

## Supplement 1: Search Strategy

### MEDLINE

Database: Ovid MEDLINE(R) ALL <1946 to January 17, 2020>

Search Strategy:

- 
- 1 exp Vitamin D/ (57819)
  - 2 (Cholecalciferol\* or calciol or HYDROXYCHOLECALCIFEROL\* or hydroxyvitamins d or CALCIFEDIOL or 25 hydroxyvitamin d3 or 25-hydroxycholecalciferol or calcidiol or DIHYDROXYCHOLECALCIFEROL\* or dihydroxyvitamins d or CALCITRIOL or 1 alpha,25 dihydroxyvitamin d3 or 1 alpha,25-dihydroxycholecalciferol or 1,25-dihydroxyvitamin d3 or ergocalciferol\* or Dihydrotachysterol or 25-Hydroxyvitamin D 2).mp. [mp=title, abstract, original title, name of substance word, subject heading word, floating sub-heading word, keyword heading word, organism supplementary concept word, protocol supplementary concept word, rare disease supplementary concept word, unique identifier, synonyms] (38570)
  - 3 (vitamin adj (d or d2 or d3 or d-2 or d-3)).mp. [mp=title, abstract, original title, name of substance word, subject heading word, floating sub-heading word, keyword heading word, organism supplementary concept word, protocol supplementary concept word, rare disease supplementary concept word, unique identifier, synonyms] (75439)
  - 4 Vitamin D Deficiency/ (15265)
  - 5 1 or 2 or 3 or 4 (87829)
  - 6 exp Hypertension/ (250658)
  - 7 hypertensi\*.mp. (499579)
  - 8 ((increase or elevat\* or high\*) adj2 blood adj1 pressure).mp. [mp=title, abstract, original title, name of substance word, subject heading word, floating sub-heading word, keyword heading word, organism supplementary concept word, protocol supplementary concept word, rare disease supplementary concept word, unique identifier, synonyms] (38782)
  - 9 ((systolic or diastolic or arterial) adj3 pressure).mp. [mp=title, abstract, original title, name of substance word, subject heading word, floating sub-heading word, keyword heading word, organism supplementary concept word, protocol supplementary concept word, rare disease supplementary concept word, unique identifier, synonyms] (179307)
  - 10 7 or 8 or 9 (627657)
  - 11 adolescent/ or exp child/ (2958419)
  - 12 (child or children or childhood or youth or teenage\* or p?ediatric\*).mp. [mp=title, abstract, original title, name of substance word, subject heading word, floating sub-heading word, keyword heading word, organism supplementary concept word, protocol supplementary concept word, rare disease supplementary concept word, unique identifier, synonyms] (2477749)
  - 13 (adolescen\* or (school adj age) or youngster\*).mp. [mp=title, abstract, original title, name of substance word, subject heading word, floating sub-heading word, keyword heading word, organism supplementary concept word, protocol supplementary concept word, rare disease supplementary concept word, unique identifier, synonyms] (2066781)
  - 14 11 or 12 or 13 (3499936)
  - 15 5 and 10 and 14 (324)
  - 16 5 and 10 (2408)
  - 17 limit 16 to "all child (0 to 18 years)" (259)
  - 18 15 or 17 (349)
  - 19 (pediatric? or child or children or adolescen\* or youth).jw. (542548)
  - 20 16 and 19 (58)
  - 21 18 or 20 (353)

## **EMBASE**

Database: Embase Classic <1947 to 1973>, Embase <1974 to 2020 January 17>

Search Strategy:

- 
- 1 exp vitamin D/ (140645)
  - 2 exp vitamin D deficiency/ (28964)
  - 3 (Cholecalciferol\* or calciol or HYDROXYCHOLECALCIFEROL\* or hydroxyvitamins d or CALCIFEDIOL or 25 hydroxyvitamin d3 or 25-hydroxycholecalciferol or calcidiol or DIHYDROXYCHOLECALCIFEROL\* or dihydroxyvitamins d or CALCITRIOL or 1 alpha,25 dihydroxyvitamin d3 or 1 alpha,25-dihydroxycholecalciferol or 1,25-dihydroxyvitamin d3 or ergocalciferol\* or Dihydrotachysterol or 25-Hydroxyvitamin D 2).mp. (52332)
  - 4 (vitamin adj (d or d2 or d3 or d-2 or d-3)).mp. (130950)
  - 5 1 or 2 or 3 or 4 (162755)
  - 6 exp hypertension/ (733633)
  - 7 hypertensi\*.mp. (938420)
  - 8 ((increase or elevat\* or high\*) adj2 blood adj1 pressure).mp. (58276)
  - 9 ((systolic or diastolic or arterial) adj3 pressure).mp. (355528)
  - 10 6 or 7 or 8 or 9 (1221108)
  - 11 child/ (1769502)
  - 12 exp adolescent/ (1484727)
  - 13 (child or children or childhood or youth or teenage\* or p?ediatric\*).mp. (2867838)
  - 14 (adolescen\* or (school adj age) or youngster\*).mp. (1596691)
  - 15 11 or 12 or 13 or 14 (3542372)
  - 16 5 and 10 and 15 (1398)
  - 17 5 and 10 (10579)
  - 18 limit 17 to child <unspecified age> (646)
  - 19 16 or 18 (1398)

**CINAHL**

| #   | Query                                                                                                                                                                                                            | Limiters/Expanders                                                                                          | Results |
|-----|------------------------------------------------------------------------------------------------------------------------------------------------------------------------------------------------------------------|-------------------------------------------------------------------------------------------------------------|---------|
| S17 | S14 OR S16                                                                                                                                                                                                       | Expanders - Apply equivalent subjects<br>Search modes - Boolean/Phrase                                      | 83      |
| S16 | S5 AND S9                                                                                                                                                                                                        | Expanders - Apply equivalent subjects<br>Narrow by SubjectAge: - all child<br>Search modes - Boolean/Phrase | 71      |
| S15 | S5 AND S9                                                                                                                                                                                                        | Expanders - Apply equivalent subjects<br>Search modes - Boolean/Phrase                                      | 463     |
| S14 | S5 AND S9 AND S13                                                                                                                                                                                                | Expanders - Apply equivalent subjects<br>Search modes - Boolean/Phrase                                      | 83      |
| S13 | S10 OR S11 OR S12                                                                                                                                                                                                | Expanders - Apply equivalent subjects<br>Search modes - Boolean/Phrase                                      | 961,298 |
| S12 | Ti (youngster or school age or adolescen* or paediatric* or pediatric* or teenage* or youth or child*) or ab (youngster or school age or adolescen* or paediatric* or pediatric* or teenage* or youth or child*) | Expanders - Apply equivalent subjects<br>Search modes - Boolean/Phrase                                      | 398,135 |
| S11 | (MH "Adolescence+")                                                                                                                                                                                              | Expanders - Apply equivalent subjects<br>Search modes - Boolean/Phrase                                      | 477,443 |
| S10 | (MH "Child+")                                                                                                                                                                                                    | Expanders - Apply equivalent subjects<br>Search modes - Boolean/Phrase                                      | 596,921 |
| S9  | S6 OR S7 OR S8                                                                                                                                                                                                   | Expanders - Apply equivalent subjects<br>Search modes - Boolean/Phrase                                      | 81,207  |
| S8  | ti (high or elevated or increase* or systolic or diastolic or arterial) n3 pressure* or ab (high or elevated or increase* or systolic or diastolic or arterial) n3 pressure*                                     | Expanders - Apply equivalent subjects<br>Search modes - Boolean/Phrase                                      | 5,573   |
| S7  | ti hypertensi* or ab hypertensi*                                                                                                                                                                                 | Expanders - Apply equivalent subjects<br>Search modes - Boolean/Phrase                                      | 35,745  |
| S6  | (MH "Hypertension+")                                                                                                                                                                                             | Expanders - Apply equivalent subjects<br>Search modes - Boolean/Phrase                                      | 69,915  |
| S5  | S1 OR S2 OR S3 OR S4                                                                                                                                                                                             | Expanders - Apply equivalent subjects<br>Search modes - Boolean/Phrase                                      | 20,348  |
| S4  | Ti (vitamin d or vitamin d2 or vitamin d3 or vitamin d 3 or vitamin d 2) or ab (vitamin d or vitamin d2 or vitamin d3 or vitamin d 3 or vitamin d 2)                                                             | Expanders - Apply equivalent subjects<br>Search modes - Boolean/Phrase                                      | 10,864  |
| S3  | Ti (alpha,25-dihydroxycholecalciferol or ergocalciferol* or Dihydrotachysterol or                                                                                                                                | Expanders - Apply equivalent subjects<br>Search modes - Boolean/Phrase                                      | 101     |

|    |                                                                                                                                                                                                                                                                                                                                                                                                                                        |                                                                        |        |
|----|----------------------------------------------------------------------------------------------------------------------------------------------------------------------------------------------------------------------------------------------------------------------------------------------------------------------------------------------------------------------------------------------------------------------------------------|------------------------------------------------------------------------|--------|
|    | dihydroxyvitamin d or dihydroxyvitamins d or 1 alpha,25 dihydroxyvitamin d3 or 1 alpha,25-dihydroxycholecalciferol or 1,25-dihydroxyvitamin d3 or 25-Hydroxyvitamin D 2) or ab (alpha,25-dihydroxycholecalciferol or ergocalciferol* or Dihydrotachysterol or dihydroxyvitamin d or dihydroxyvitamins d or 1 alpha,25 dihydroxyvitamin d3 or 1 alpha,25-dihydroxycholecalciferol or 1,25-dihydroxyvitamin d3 or 25-Hydroxyvitamin D 2) |                                                                        |        |
| S2 | Ti (Cholecalciferol* or calciol or HYDROXYCHOLECALCIFEROL* or CALCIFEDIOL or 25-hydroxycholecalciferol or calcidol or DIHYDROXYCHOLECALCIFEROL* or CALCITRIOL) or ab (Cholecalciferol* or calciol or HYDROXYCHOLECALCIFEROL* or CALCIFEDIOL or 25-hydroxycholecalciferol or calcidol or DIHYDROXYCHOLECALCIFEROL* or CALCITRIOL)                                                                                                       | Expanders - Apply equivalent subjects<br>Search modes - Boolean/Phrase | 360    |
| S1 | (MH "Vitamin D+") OR (MH "Vitamin D Deficiency+")                                                                                                                                                                                                                                                                                                                                                                                      | Expanders - Apply equivalent subjects<br>Search modes - Boolean/Phrase | 18,743 |

**PUBMED**

| Search | Query                                                                                                                                                                                                                                                                                         | Items found |
|--------|-----------------------------------------------------------------------------------------------------------------------------------------------------------------------------------------------------------------------------------------------------------------------------------------------|-------------|
| #29    | Search (#7 and #17 and #28)                                                                                                                                                                                                                                                                   | 3648        |
| #28    | Search (#18 or #19 or #20 or #21 or #22 or #23 or #24 or #25 or #26 or #27)                                                                                                                                                                                                                   | 3454758     |
| #27    | Search youngster*[tiab]                                                                                                                                                                                                                                                                       | 2476        |
| #26    | Search school age[tiab]                                                                                                                                                                                                                                                                       | 13013       |
| #25    | Search adolescen*[tiab]                                                                                                                                                                                                                                                                       | 286605      |
| #24    | Search paediatric*[tiab]                                                                                                                                                                                                                                                                      | 64591       |
| #23    | Search pediatric*[tiab]                                                                                                                                                                                                                                                                       | 289152      |
| #22    | Search teenage*[tiab]                                                                                                                                                                                                                                                                         | 20898       |
| #21    | Search youth[tiab]                                                                                                                                                                                                                                                                            | 68591       |
| #20    | Search ((child[tiab] or children[tiab] or childhood[tiab]))                                                                                                                                                                                                                                   | 1333474     |
| #19    | Search child[mesh]                                                                                                                                                                                                                                                                            | 1872154     |
| #18    | Search adolescent[mesh]                                                                                                                                                                                                                                                                       | 1983762     |
| #17    | Search (# 8 or #9 or #10 or #11 or #12 or #13 or #14 or #15 or #16)                                                                                                                                                                                                                           | 4646659     |
| #16    | Search (hypertension[tiab] or hypertensive[tiab] or hypertensives[tiab])                                                                                                                                                                                                                      | 426502      |
| #15    | Search arterial pressure[tiab]                                                                                                                                                                                                                                                                | 58738       |
| #14    | Search diastolic pressure[tiab]                                                                                                                                                                                                                                                               | 13643       |
| #13    | Search systolic pressure[tiab]                                                                                                                                                                                                                                                                | 13954       |
| #12    | Search increase blood pressure*[tiab]                                                                                                                                                                                                                                                         | 760         |
| #11    | Search elevated blood pressure[tiab]                                                                                                                                                                                                                                                          | 6289        |
| #10    | Search ((systolic blood pressure*[tiab] or diastolic blood pressure*[tiab] or arterial blood pressure*[tiab]))                                                                                                                                                                                | 98847       |
| #9     | Search high blood pressure*[tiab]                                                                                                                                                                                                                                                             | 14672       |
| #8     | Search hypertension[mesh]                                                                                                                                                                                                                                                                     | 250320      |
| #7     | Search (#1 or #2 or #3 or #4 or #5 or #6)                                                                                                                                                                                                                                                     | 87699       |
| #6     | Search (vitamin d[tiab] or vitamin d2[tiab] or vitamin d3[tiab] or vitamin d 3[tiab] or vitamin d 2[tiab])                                                                                                                                                                                    | 66554       |
| #5     | Search (dihydroxyvitamin d[tw] or dihydroxyvitamins d[tw] or 1 alpha,25 dihydroxyvitamin d3[tw] or 1 alpha,25-dihydroxycholecalciferol[tw] or 1,25-dihydroxyvitamin d3[tw] or 25-Hydroxyvitamin D 2[tw])                                                                                      | 12196       |
| #4     | Search 25 hydroxyvitamin d3 [tw]                                                                                                                                                                                                                                                              | 2989        |
| #3     | Search (Cholecalciferol*[tw] or calciol[tw] or HYDROXYCHOLECALCIFEROL*[tw] or CALCIFEDIOL[tw] or 25-hydroxycholecalciferol[tw] or calcidiol[tw] or DIHYDROXYCHOLECALCIFEROL*[tw] or CALCITRIOL[tw] or alpha,25-dihydroxycholecalciferol[tw] or ergocalciferol*[tw] or Dihydrotachysterol[tw]) | 36629       |
| #2     | Search vitamin D deficiency [mesh:noexp]                                                                                                                                                                                                                                                      | 15220       |
| #1     | Search vitamin D [mesh]                                                                                                                                                                                                                                                                       | 57729       |

### **Cochrane Library**

#1 MeSH descriptor: [Vitamin D] explode all trees 4778  
#2 MeSH descriptor: [Vitamin D Deficiency] explode all trees 1269  
#3 (Cholecalciferol\* or calciol or HYDROXYCHOLECALCIFEROL\* or CALCIFEDIOL):ti,ab,kw 3039  
#4 (calcidiol or DIHYDROXYCHOLECALCIFEROL\* or CALCITRIOL):ti,ab,kw 1897  
#5 (ergocalciferol\* or Dihydrotachysterol or dihydroxyvitamin d or dihydroxyvitamins d or 1 alpha,25 dihydroxyvitamin d3):ti,ab,kw 1826  
#6 (vitamin d):ti,ab,kw 12995  
#7 (vitamin d2 or vitamin d 3):ti,ab,kw 7528  
#8 #1 or #2 or #3 or #4 or #5 or #6 or #7 14586  
#9 MeSH descriptor: [Hypertension] explode all trees 17001  
#10 (hypertensi\* or (high or elevated or increase\* or systolic or diastolic or arterial) near/3 pressure\*):ti,ab,kw 568810  
#11 #9 or #10 568810  
#12 MeSH descriptor: [Child] explode all trees 1209  
#13 MeSH descriptor: [Adolescent] explode all trees 102003  
#14 (youngster or school age or adolescen\* or paediatric\* or pediatric\* or teenage\* or youth or child\*):ti,ab,kw 243608  
#15 #12 or #13 or #14 243608  
#16 #8 and #11 and #15 1559  
1525 Trials matching "#16 - #8 and #11 and #15"

### **ClinicalTrial.gov**

Hypertension | Vitamin D | Child  
Applied filter: Child (birth-17)

### **Supplement Figure S1: Sensitivity analyses**

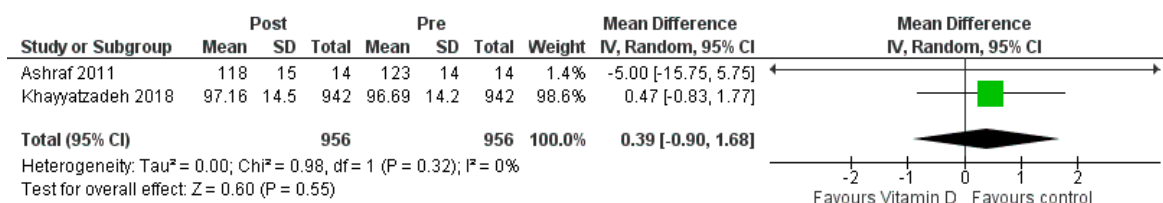

**Figure a.** Forest plot of sensitivity analysis of mean differences in SBP (in mmHg) before and after subjects receiving vitamin D supplementation (excluding vitamin D sufficient patients from Khayatzadeh, 2018).

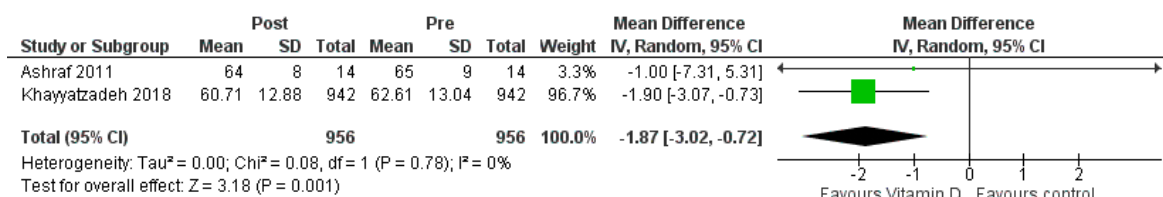

**Figure b.** Forest plot of sensitivity analysis of mean differences in DBP (in mmHg) before and after subjects receiving vitamin D supplementation (excluding vitamin D sufficient patients from Khayatzadeh, 2018).

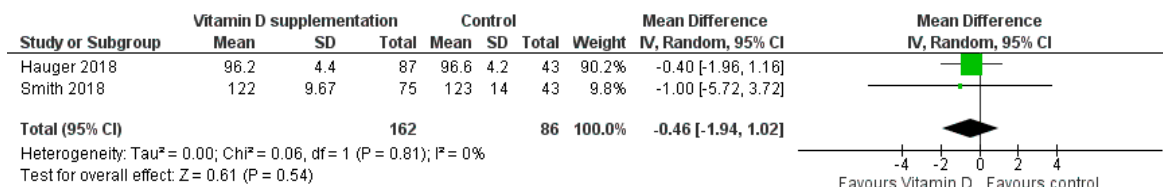

**Figure c.** Forest plot of sensitivity analysis of mean differences in SBP (in mmHg) between subjects receiving vitamin D supplementation compared with their comparators (excluding Al Daghri, 2019 as the source of heterogeneity).

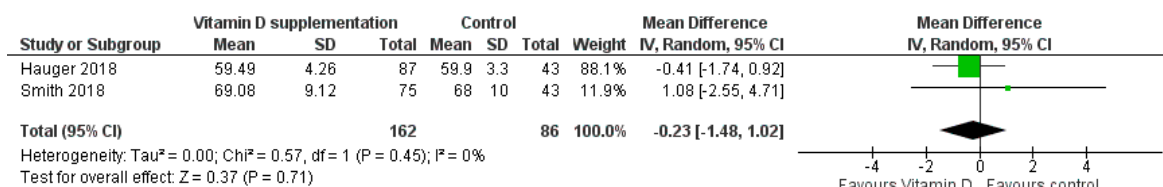

**Figure d.** Forest plot of sensitivity analysis of mean differences in SBP (in mmHg) between subjects receiving vitamin D supplementation compared with their comparators (excluding Al Daghri, 2019 which included only vitamin D deficient patients)

**Figure S1.** Meta-analysis of the sensitivity analyses of the effects of vitamin D supplementation on SBP and DBP. Mean differences for each study are represented by squares, and 95% CIs are represented by the lines through the squares. The pooled mean differences are represented by diamonds. Between-study heterogeneity was assessed with the use of the I<sup>2</sup> statistic. SBP: Systolic blood pressure; DBP: Diastolic blood pressure.

**Supplement: GRADEing of the Meta-analysis**

**Table S1: Quality of evidence of NRS and RCTs**

| NRS                             | Certainty assessment  |                          |                      |               |                      | No of patients  |                     | Effect                                     | Certainty        |
|---------------------------------|-----------------------|--------------------------|----------------------|---------------|----------------------|-----------------|---------------------|--------------------------------------------|------------------|
|                                 | No of studies         | Study design             | Risk of bias         | Inconsistency | Indirectness         | Imprecision     | Pre-supplementation | Post-supplementation                       |                  |
| <b>Systolic blood pressure</b>  |                       |                          |                      |               |                      |                 |                     |                                            |                  |
| 2                               | Observational studies | Not serious              | Not serious          | Not serious   | Serious <sup>b</sup> | 1002            | 1002                | MD 0.33 higher (0.93 lower to 1.58 higher) | ⊕○○○<br>VERY LOW |
| <b>Diastolic blood pressure</b> |                       |                          |                      |               |                      |                 |                     |                                            |                  |
| 2                               | Observational studies | Not serious              | Not serious          | Not serious   | Not serious          | 1002            | 1002                | MD 2.26 lower (3.4 lower to 1.12 lower)    | ⊕⊕○○<br>LOW      |
| RCTs                            | Certainty assessment  |                          |                      |               |                      | No of patients  |                     | Effect                                     | Certainty        |
| No of studies                   | Study design          | Risk of bias             | Inconsistency        | Indirectness  | Imprecision          | Supplementation | No supplementation  | Absolute (95% CI)                          |                  |
| <b>Systolic blood pressure</b>  |                       |                          |                      |               |                      |                 |                     |                                            |                  |
| 3                               | Randomized trials     | Not serious <sup>a</sup> | Serious <sup>c</sup> | Not serious   | Serious <sup>b</sup> | 328             | 266                 | MD 2.04 lower (5.12 lower to 1.04 higher)  | ⊕⊕○○<br>LOW      |
| <b>Diastolic blood pressure</b> |                       |                          |                      |               |                      |                 |                     |                                            |                  |
| 3                               | Randomized trials     | Not serious <sup>a</sup> | Not serious          | Not serious   | Serious <sup>b</sup> | 328             | 266                 | MD 0.01 higher (1.09 lower to 1.12 higher) | ⊕⊕⊕○<br>MODERATE |

CI: Confidence interval; MD: Mean difference; NRS: Non-randomized human interventions study; RCT: Randomized controlled trial

**Explanations**

- a. Al Daghri (2019) has some risk of bias with respect to blinding of participants, personnel and outcome assessors and to other bias. It contributed to only 21% of the weight.
- b. Downgraded by one level due to serious imprecision. Confidence interval crosses the line of no effect.
- c. Downgraded by one level due to serious inconsistency. Unexplained heterogeneity I<sup>2</sup>=71%.



**Table S2: Sensitivity analyses of the quality of evidence of NRS and RCTs**

| NRS                                                                                                           | Certainty assessment  |              |               |              |                      | No of patients            |                    | Effect                                       | Certainty        |
|---------------------------------------------------------------------------------------------------------------|-----------------------|--------------|---------------|--------------|----------------------|---------------------------|--------------------|----------------------------------------------|------------------|
| No of studies                                                                                                 | Study design          | Risk of bias | Inconsistency | Indirectness | Imprecision          | Vitamin D supplementation | No supplementation | Absolute (95% CI)                            |                  |
| <b>Systolic blood pressure (excluding vitamin D sufficient patients from Khayyat-zadeh, 2018)</b>             |                       |              |               |              |                      |                           |                    |                                              |                  |
| 2                                                                                                             | Observational studies | Not serious  | Not serious   | Not serious  | Serious <sup>a</sup> | 956                       | 956                | MD 0.39 higher<br>(0.9 lower to 1.68 higher) | ⊕○○○<br>VERY LOW |
| <b>Diastolic blood pressure (excluding vitamin D sufficient patients from Khayyat-zadeh, 2018)</b>            |                       |              |               |              |                      |                           |                    |                                              |                  |
| 2                                                                                                             | Observational studies | Not serious  | Not serious   | Not serious  | Not serious          | 956                       | 956                | MD 1.87 lower<br>(3.02 lower to 0.72 lower)  | ⊕⊕○○<br>LOW      |
| RCTs                                                                                                          | Certainty assessment  |              |               |              |                      | No of patients            |                    | Effect                                       | Certainty        |
| No of studies                                                                                                 | Study design          | Risk of bias | Inconsistency | Indirectness | Imprecision          | Vitamin D supplementation | No supplementation | Absolute (95% CI)                            |                  |
| <b>Systolic blood pressure (excluding Al Dag-hri, 2019 as the source of heterogeneity)</b>                    |                       |              |               |              |                      |                           |                    |                                              |                  |
| 2                                                                                                             | Randomized trials     | Not serious  | Not serious   | Not serious  | Serious <sup>a</sup> | 162                       | 86                 | MD 0.46 lower<br>(1.94 lower to 1.02 higher) | ⊕⊕⊕○<br>MODERATE |
| <b>Diastolic blood pressure (excluding Al Dag-hri, 2019 which included only vitamin D deficient patients)</b> |                       |              |               |              |                      |                           |                    |                                              |                  |
| 2                                                                                                             | Randomized trials     | Not serious  | Not serious   | Not serious  | Serious <sup>a</sup> | 162                       | 86                 | MD 0.23 lower<br>(1.48 lower to 1.02 higher) | ⊕⊕⊕○<br>MODERATE |

CI: Confidence interval; MD: Mean difference; NRS: Non-randomized human interventions study; RCT: Randomized controlled trial

**Explanations**

a. Downgraded by one level due to serious imprecision. Confidence interval crosses the line of no effect.
